# Supplementary material
Source: HighWire-hosted journal article supplement (https://jnm.snmjournals.org/highwire/filestream/94927/field_highwire_adjunct_files/0/171306_Supplemental_Data.pdf)
Supplement: 171306_Supplemental_Data.pdf [file 171306_Supplemental_Data.pdf]

## **Supplemental Materials**

### **Radiolabeling of 5F7 Nanobody with $^{18}\text{F}$ -RL-I, $^{18}\text{F}$ -SFB, and $^{125}\text{I}$ -SGMIB**

The prosthetic agent  $^{125}\text{I}$ -SGMIB was synthesized by the radioiodination of its tin precursor as reported before (1). Briefly, acetic acid in  $\text{CHCl}_3$  {3% (v/v), 2  $\mu\text{l}$ }, *tert*-butyl hydroperoxide (TBHP) in  $\text{CHCl}_3$  {30% (w/v), 5  $\mu\text{L}$ }, and 50  $\mu\text{g}$  of tin precursor in  $\text{CHCl}_3$  (15  $\mu\text{l}$ ) were added to a vial containing 37-74 MBq  $^{125}\text{I}$  in 2-4  $\mu\text{L}$  of 0.1 N NaOH. The mixture was stirred at 20 °C for 30 min, and  $^{125}\text{I}$ -SGMIB was purified by normal phase HPLC.  $^{18}\text{F}$ -SFB was synthesized by adapting a reported one pot procedure (2) and purified by normal phase HPLC (3). The synthesis and purification of  $^{18}\text{F}$ -RL-I was performed as described recently by the click reaction of a protected azido precursor with  $^{18}\text{F}$ -fluorohexyne (3). It was deprotected by treatment with trifluoroacetic acid before reaction with the Nanobody.

The Nanobody 5F7 was radioiodinated using  $^{125}\text{I}$ -SGMIB as reported before (4) and it was labeled with  $^{18}\text{F}$  using  $^{18}\text{F}$ -SFB adapting procedures used for labeling other proteins (5). Briefly, 50  $\mu\text{l}$  of 5F7 solution in 0.1M borate buffer (2 mg/ml), pH 8.5 was added to the radiolabeled prosthetic agents, and the mixture incubated at 20°C for 20 min. Labeled Nanobody was isolated by gel filtration over a PD10 column (GE Healthcare, Piscataway, NJ) that was eluted with PBS, pH 7.4, and collecting 250  $\mu\text{L}$  fractions; the protein typically eluted in fractions 5-10. For labeling 5F7 with  $^{18}\text{F}$ -RL-I, essentially the same procedure was used except 100  $\mu\text{l}$  of the Nanobody solution was used.

### **Internalization assay**

The ability of the prosthetic groups  $^{18}\text{F}$ -RL-I and  $^{18}\text{F}$ -SFB for trapping  $^{18}\text{F}$  activity from radiolabeled 5F7 Nanobody within HER2-expressing cells after internalization was determined by paired label assays using BT474M1 breast carcinoma cells. For this, 5F7 Nanobody labeled with  $^{125}\text{I}$ -SGMIB served as common reference. Cells were plated at a density of  $8 \times 10^5$  cells per well in 3 mL medium in 6-well plates. After overnight incubation at 37°C, cells were incubated at 4°C

for 30 min. Medium was replaced with fresh medium containing labeled protein pair (5 nM each of  $^{18}\text{F}$ -RL-I-5F7 and  $^{125}\text{I}$ -SGMIB-5F7, or  $^{18}\text{F}$ -SFB-5F7 and  $^{125}\text{I}$ -SGMIB-5F7) and the cells were incubated at 4°C for 1 h. Cell culture supernatants containing unbound radioactivity were removed and cells were supplemented with fresh medium, and brought to 37°C. Cells were incubated at 37°C for 1, 2 and 4 h, and processed as follows. After withdrawing cell culture supernatants, cell membrane-bound radioactivity was removed by incubating with an acidic medium, and cells were solubilized by treatment with 0.1 N NaOH. Cell culture supernatants, acid wash, and cell lysates were counted for  $^{18}\text{F}$  and  $^{125}\text{I}$  radioactivity using an automated gamma counter (Perkin Elmer Wizard II, Shelton, CT) that corrects for cross-over, decay and dead time. From these data, the percent of initially bound radioactivity that was internalized, membrane-bound and that in supernatants was calculated. Parallel experiments also were performed with a 100-fold molar excess of trastuzumab to determine nonspecific uptake.

#### **BT474M1 xenografts**

Sixty-day continuous-release 17- $\beta$ -estradiol pellets (Innovative Research of America) were implanted in the backs of 10- to 12-wk-old female NOD.CB17-Prkdcscid/J mice (Jackson Laboratories). Two days later, the mice were inoculated in the flank with  $5 \times 10^6$  BT474M1 cells in 50% Matrigel (BD Biosciences). Biodistribution studies were initiated 5-6 weeks later when tumors reached a volume of 350–500 mm<sup>3</sup>.

1. Vaidyanathan G, Zalutsky MR. Synthesis of *N*-succinimidyl 4-guanidinomethyl-3-[ $^{125}\text{I}$ ]iodobenzoate: a radio-iodination agent for labeling internalizing proteins and peptides. *Nature protocols*. 2007;2:282-286.
2. Tang G, Zeng WB, Yu MX, Kabalka G. Facile synthesis of *N*-succinimidyl 4-[ $^{18}\text{F}$ ]fluorobenzoate ([ $^{18}\text{F}$ ]SFB) for protein labeling. *J Labelled Compd Rad*. 2008;51:68-71.
3. Vaidyanathan G, McDougald, D, Choi J, Pruszynski M, Koumariou E, Zhou Z, and Zalutsky M.R. *N*-Succinimidyl 3-((4-(4-[ $^{18}\text{F}$ ]fluorobutyl)-1H-1,2,3-triazol-1-yl)methyl)-5-(guanidinomethyl)benzoate ([ $^{18}\text{F}$ ]SFBTMGMB): A residualizing label for  $^{18}\text{F}$ -labeling of internalizing biomolecules. *Org Biomol Chem*. 2016;14:1261 - 1271.

4. Pruszynski M, Koumariou E, Vaidyanathan G, et al. Improved tumor targeting of anti-HER2 nanobody through *N*-succinimidyl 4-guanidinomethyl-3-iodobenzoate radiolabeling. *J Nucl Med.* 2014;55:650-656.
5. Vaidyanathan G, Bigner DD, Zalutsky MR. Fluorine-18-labeled monoclonal antibody fragments: a potential approach for combining radioimmunoscinigraphy and positron emission tomography. *J Nucl Med.*1992;33:1535-1541.
